# Supplementary material for: Age and Environment Influences on Mouse Prion Disease Progression: Behavioral Changes and Morphometry and Stereology of Hippocampal Astrocytes
Source: Oxid Med Cell Longev. 2017 Jan 24;2017:4504925. doi: 10.1155/2017/4504925 (PMC5294381; doi:10.1155/2017/4504925)
Supplement: Supplementary file 1 — Table S1. Environmental influences on burrowing activity in both prion diseased and control mice. Table S2. Environmental influences on object recognition scores in both prion diseased and control mice. Table S3. Environmental influences on number and morphometry of astrocytes in both prion diseased and control mice. [file 4504925.f1.xlsx]

## Sheet: Table S1
	Burrowing - Two-way RM ANOVA
	Young (NBH and ME7) vs Aged (NBH and ME7)
		F	P value
	Interaction	5.715	< 0.0001
	Time	27.24	< 0.0001
	Column Factor	23.9	< 0.0001
	Subjects (matching)	2.786	0.0004
	Bonferroni posttests
		NBH SE vs ME7 SE		NBH SE vs NBH A		ME7 SE vs ME7 A		NBH A vs ME7 A
	Column Factor	t	P value	t	P value	t	P value	t	P value
	7WPI	0.384	ns	0.9107	ns	1.287	ns	1.794	ns
	9WPI	1.984	ns	1.678	ns	2.56	ns	2.21	ns
	11WPI	2.861	P < 0.05	2.538	ns	2.519	ns	2.192	ns
	13WPI	4.093	P<0.001	3.373	P<0.01	3.479	P<0.01	2.747	ns
	15WPI	5.639	P<0.001	0.9495	ns	5.737	P<0.001	0.8229	ns
	16WPI	6.964	P<0.001	3.938	P<0.01	3.608	P<0.01	0.5888	ns
	17WPI	6.299	P<0.001	6.545	P<0.001	0.5553	ns	0.00758	ns
	18WPI	6.395	P<0.001	5.495	P<0.001	0.1692	ns	0.4943	ns
	Burrowing - Two-way RM ANOVA
	NHB (SE and EE) vs ME7 (SE and EE)
		F	P value
	Interaction	6.391	< 0.0001
	Time	12.18	< 0.0001
	exper.Group	52.27	< 0.0001
	Subjects (matching)	2.723	0.0004
	Bonferroni posttests
		NBH SE vs ME7 SE		NBH SE vs NBH EE		ME7 SE vs ME7 EE		NBH EE vs ME7 EE
	Column Factor	t	P value	t	P value	t	P value	t	P value
	7WPI	0.4001	ns	1.595	ns	0.607	ns	2.699	ns
	9WPI	2.067	ns	1.513	ns	0.6532	ns	1.234	ns
	11WPI	2.981	P < 0.05	0.7221	ns	1.194	ns	2.75	ns
	13WPI	4.265	P<0.001	1.57	ns	0.639	ns	2.188	ns
	15WPI	5.875	P<0.001	0.1259	ns	0.9679	ns	5.326	P<0.001
	16WPI	7.256	P<0.001	0.461	ns	1.169	ns	6.925	P<0.001
	17WPI	6.563	P<0.001	0.5937	ns	1.564	ns	7.825	P<0.001
	18WPI	6.663	P<0.001	0.5849	ns	1.483	ns	9.084	P<0.001
	Burrowing one-way RM ANOVA - Bonferroni's Multiple Comparison Test
		NBH SE		ME7 SE		NBH EE		ME7 EE		NBH A		ME7 A
		t	P value	t	P value	t	P value	t	P value	t	P value	t	P value
	7WPI vs 9WPI	1.392	ns	0.5619	ns	3.098	ns	0.8294	ns	0.2047	ns	0.6518	ns
	7WPI vs 11WPI	2.299	ns	0.7788	ns	0.9418	ns	1.747	ns	0.09974	ns	0.344	ns
	7WPI vs 13WPI	2.347	ns	1.86	ns	2.146	ns	1.15	ns	1.075	ns	0.03143	ns
	7WPI vs 15WPI	0.8032	ns	4.233	P<0.01	1.306	ns	4.054	P<0.01	0.6093	ns	0.4935	ns
	7WPI vs 16WPI	1.275	ns	5.13	P<0.001	0.2978	ns	5.064	P<0.001	2.638	ns	3.825	P < 0.05
	7WPI vs 17WPI	1.856	ns	4.162	P<0.01	1.231	ns	6.846	P<0.01	5.333	P<0.001	7.016	P<0.001
	7WPI vs 18WPI	1.333	ns	4.58	P<0.01	0.05186	ns	7.331	P<0.01	4.484	P<0.01	6.765	P<0.001

## Sheet: Table S2
	Object recognition - PLACE
		NBH-SE		ME7-SE		NBH-EE		ME7-EE		NBH-A		ME7-A
		Stationary	Displaced	Stationary	Displaced	Stationary	Displaced	Stationary	Displaced	Stationary	Displaced	Stationary	Displaced
	Mean	33.73	66.28	47.3	52.7	76.25	23.75	36.82	63.18	45.53	54.5	42.92	57.1
	Std. Deviation	18.14	18.14	23	23	19.27	19.27	20.7	20.7	9.452	9.395	9.602	9.568
	Std. Error	9.071	9.071	10.29	10.29	7.869	7.869	6.546	6.546	5.457	5.424	4.294	4.279
	P value	0.0442		0.7201		0.0008		0.0107		0.4966		0.1735
	Object recognition - IDENTITY
		NBH-SE		ME7-SE		NBH-EE		ME7-EE		NBH-A		ME7-A
		Novel	Familiar	Novel	Familiar	Novel	Familiar	Novel	Familiar	Novel	Familiar	Novel	Familiar
	Mean	62.3	37.7	21.26	78.74	39.68	60.32	68.46	31.54	62.43	37.58	44.13	55.89
	Std. Deviation	10.85	10.85	29.88	29.88	13.66	13.66	20.52	20.52	8.859	8.859	12.85	12.83
	Std. Error	4.43	4.43	13.36	13.36	6.107	6.107	7.254	7.254	4.43	4.43	4.857	4.851
	P value	0.0028		0.016		0.0439		0.0029		0.0074		0.1125

## Sheet: Table S3
	Volume					Surface					Length
		NBH		ME7			NBH		ME7			NBH		ME7
		Mean	Std. Error	Mean	Std. Error		Mean	Std. Error	Mean	Std. Error		Mean	Std. Error	Mean	Std. Error
	SE	79.8667	8.48338	402.4	24.1534	SE	329.633	5.04061	1133	54.7172	SE	328.967	4.68413	410.75	27.0614
	EE	97.3	14.1664	307.433	3.73154	EE	589.125	82.0273	974.392	37.3226	EE	415.6	55.0732	414.333	52.1268
	A	85.1667	27.277	111.8	14.7436	A	432.733	73.2227	518.78	47.4323	A	258.633	20.8008	273.54	18.3882
	Pol-DG GFAP+ cells by Optical Frationator					CA3 GFAP+ cells by Optical Frationator					Pol-DG Cell body volume by Nucleator					CA3 Cell body volume by Nucleator
		NBH		ME7			NBH		ME7			NBH		ME7			NBH		ME7
		Mean	Std. Error	Mean	Std. Error		Mean	Std. Error	Mean	Std. Error		Mean	Std. Error	Mean	Std. Error		Mean	Std. Error	Mean	Std. Error
	SE	3912	376.293	5342	227.509	SE	6765.67	963.966	6697.75	1037.71	SE	200.265	28.9403	575.888	46.615	SE	255.34	23.3999	760.96	40.1186
	EE	5591	289.047	5870.67	504.953	EE	7753	1233.69	9943.25	378.198	EE	228.427	10.983	530.953	41.785	EE	257.227	25.6603	553.107	21.4022
	A	5146.5	549.188	5650	318.14	A	11275	587.633	9653.75	595.706	A	211.334	15.7206	245.823	27.1503	A	280.73	0.329085	344.178	19.1567
		50		100
	Two-way ANOVA
	Prion disease vs Environment	Volume		SURFACE		LENGTH		Pol-DG GFAP+ cells		CA3 GFAP+ cells		Pol-DG Cell body volume		CA3 Cell body volume
		F	P value	F	P value	F	P value	F	P value	F	P value	F	P value	F	P value
	Interaction	10.91	0.008	11.97	0.0061	0.9594	0.3504	2.721	0.1335	1.489	0.2503	0.8678	0.3735	11.77	0.0064
	Prion disease	245.1	< 0.0001	96.74	< 0.0001	0.9018	0.3647	6.01	0.0367	1.316	0.2781	74.69	< 0.0001	171.8	< 0.0001
	Environment	5.192	0.0459	0.6969	0.4233	1.132	0.3123	10.02	0.0114	5.233	0.0452	0.04569	0.835	11.35	0.0071
	Prion disease vs Age	F	P value	F	P value	F	P value	F	P value	F	P value	F	P value	F	P value
	Interaction	53.1	< 0.0001	44.76	< 0.0001	2.41	0.1488	1.383	0.2645	0.833	0.3829	24.22	0.0005	62.06	< 0.0001
	Prion disease	73.93	< 0.0001	68.81	< 0.0001	5.039	0.0463	6.021	0.032	0.9851	0.3444	35.01	0.0001	102.8	< 0.0001
	Age	49.36	< 0.0001	22.72	0.0006	23.21	0.0005	3.832	0.0761	19.24	0.0014	21.18	0.0008	48.62	< 0.0001
	Two-way ANOVA - Bonferroni's posttest
		Three dimensional morphometry						Total GFAP+ cells by Optical Frationator				Cell body volume by Nucleator
		Volume		SURFACE		LENGTH		DG Pol total cells		CA3 Rad. total cells		DG Pol soma volume		CA3 Rad. soma volume
		t	P value	t	P value	t	P value	t	P value	t	P value	t	P value	t	P value
	NBHSE vs ME7SE	10.99	P<0,001	10.37	P<0,001	2.627	P < 0,05	3.002	P < 0,05	0.05191	P > 0,05	6.77	P<0,001	11.69	P<0,001
	NBHA vs ME7A	0.949	P > 0,05	1.161	P > 0,05	0.5007	P > 0,05	0.9406	P > 0,05	1.347	P > 0,05	0.72	P > 0,05	1.599	P > 0,05
	NBHSE vs NBHA	0.1689	P > 0,05	1.244	P > 0,05	2.113	P > 0,05	2.135	P > 0,05	3.505	P < 0,05	0.2067	P > 0,05	0.5984	P > 0,05
	ME7SE vs ME7A	11.27	P<0,001	9.024	P<0,001	5.018	P<0,001	0.5754	P > 0,05	2.653	P < 0,05	7.501	P<0,001	11.34	P<0,001
	NBHEE vs ME7EE	8.734	P<0,001	4.509	P<0,01	0.9384	P > 0,05	0.5491	P > 0,05	1.674	P > 0,05	5.452	P<0,001	6.843	P<0,001
	NBHSE vs NBHEE	0.7246	P > 0,05	3.037	P < 0,05	2.606	P > 0,05	3.297	P < 0,05	0.7059	P > 0,05	0.4748	P > 0,05	0.04082	P > 0,05
	ME7SE vs ME7EE	3.947	P<0,01	1.856	P > 0,05	0.07483	P > 0,05	1.11	P > 0,05	2.679	P < 0,05	0.8747	P > 0,05	5.193	P<0,001
